# Supplementary material
Source: PubMed Central journal article supplement (PMC3288646)
Supplement: NIHMS348566-supplement-1.pdf [file NIHMS348566-supplement-1.pdf]

## **SUPPLEMENTAL MATERIAL**

### **THE ALBUMIN IN SUBARACHNOID HEMORRHAGE (ALISAH) MULTICENTER PILOT CLINICAL TRIAL: SAFETY AND NEUROLOGIC OUTCOMES**

Jose I Suarez, MD<sup>1</sup>, Renee H. Martin, PhD<sup>2</sup>, Eusebia Calvillo, RN<sup>1</sup>, Eric M Bershad, MD<sup>1</sup>, R Loch MacDonald, MD<sup>3</sup>, John Wong,  
MD<sup>4</sup>, Robert Harbaugh, MD<sup>5</sup>, for the ALISAH Investigators<sup>6</sup>

1 Department of Neurology, Baylor College of Medicine, Houston, Tx; 2 Division of Biometry and Biostatistics, Medical University of South Carolina, Charleston, SC; 3 Department of Neurosurgery, University of Toronto, Toronto, ON, Canada; 4 University of Calgary, Calgary, AB, Canada; 5 Penn State University, Hershey, PA; 6 the complete list of investigators is provided in the appendix

#### **Corresponding author:**

Jose I Suarez, MD

Department of Neurology

Baylor College of Medicine

6501 Fannin St, NB 302

Houston, TX 77030

Tel. 713-798-8472

FAX: 713-798-3091

E-mail: [jisuarez@bcm.edu](mailto:jisuarez@bcm.edu)

**Cover title:** Albumin in Subarachnoid Hemorrhage

**Tables:8**

**Key Words:** subarachnoid hemorrhage; albumin; neuroprotection; outcome; delayed ischemic deficit

**Subject code:** [50] Cerebral Aneurysm, AVM, & Subarachnoid hemorrhage

Clinical Trial Registration: <http://clinicaltrials.gov/ct2/show/NCT00283400?term=subarachnoid+hemorrhage+houston&rank=1>

## **Table S1. ALISAH Investigators**

### **Executive Committee**

Jose I Suarez, MD, Baylor College of Medicine, Houston, TX (PI); Renee' Martin, PhD, Medical University of South Carolina, Charleston, SC (Statistician); Catherine Dillon, Medical University of South Carolina, Charleston, SC (Data Manager); Eusebia Calvillo, RN, Baylor College of Medicine, Houston, TX (Project Manager); Claudia S. Moy, PhD, NINDS, NIH, Rockville, MD (NINDS Project Officer)

### **External Safety Monitor**

Gene Sung, MD, University of Southern California, Los Angeles, CA (neurointensivist)

### **Data and Safety Monitoring Board (DSMB)**

Paul Muizelaar, MD, PhD, UC Davis, DSMB chairman; William Clarke, MS, PhD, University of Iowa; Steven M Greenberg, MD, PhD, Harvard School of Medicine; Leslie McClure, PhD, University of Alabama at Birmingham; Emmy Miller, RN, PhD, Baylor College of Medicine; Julie Swain, MD, Fallbrook, CA; Howard Yonas, MD University of New Mexico; Peter Gilbert, PhD, NINDS DSMB Liaison.

**Participating clinical sites (with numbers of subjects contributed):** Penn State University, Hershey, Pennsylvania, USA (15):

Robert Harbaugh, MD (PI), Deborah Hoffman, RN (coordinator); Baylor College of Medicine, Houston, Texas, USA (12): Jose I Suarez, MD (PI), Eric M Bershad, MD (sub-PI), Eusebia Calvillo, RN (coordinator), Jose G Diez, MD, Baylor College of Medicine, Houston, TX (Study Cardiologist), Edward Duckworth, MD, Baylor College of Medicine, Houston, TX (Study Neurosurgeon), Michel Mawad, MD (Study Neuroradiologist); University of Toronto, Toronto, Ontario, Canada (9): R Loch Macdonald, MD (PI), Yangmei Li,

PhD (coordinator); University of Calgary, Calgary, Alberta, Canada (7): John Wong, MD (PI), Michael D Hill, MD (sub-PI), Karla Ryckborst, BA, RN (coordinator); Johns Hopkins University, Baltimore, Maryland, USA (3): Judy Huang, MD (PI), Shannon Ledroux (coordinator); Case Western Reserve University, Cleveland, Ohio, USA (1): Jose I Suarez, MD (PI), Christopher Murphy, RN (coordinator).

**Table S2.** Inclusion and Exclusion Criteria

|                                                                                                                                                                                                                                                                                                                                                                                                                                                                                                                                                                                                                                                                                                                                                                                                                                                                                                                                                                                                                                                                                                                     |
|---------------------------------------------------------------------------------------------------------------------------------------------------------------------------------------------------------------------------------------------------------------------------------------------------------------------------------------------------------------------------------------------------------------------------------------------------------------------------------------------------------------------------------------------------------------------------------------------------------------------------------------------------------------------------------------------------------------------------------------------------------------------------------------------------------------------------------------------------------------------------------------------------------------------------------------------------------------------------------------------------------------------------------------------------------------------------------------------------------------------|
| <p><b><i>Inclusions</i></b></p> <ul style="list-style-type: none"><li>• At least 18 but younger than 80 years of age.</li><li>• Onset of new neurological signs of subarachnoid hemorrhage within 72 hours at the time of evaluation and initiation of treatment with 25% human albumin.</li><li>• Clinical signs consistent with the diagnosis of subarachnoid hemorrhage including severe thunderclap headache, cranial nerve abnormalities, decreased level of consciousness, meningismus and focal neurological deficits.</li><li>• Head computed tomography demonstrates subarachnoid hemorrhage (rating scale 2-4).</li><li>• Cerebral angiography reveals the presence of saccular aneurysm(s) in a location that explains the subarachnoid hemorrhage.</li><li>• Treatment of cerebral aneurysm must be carried out prior to treatment initiation but within 72 hours of symptom onset. Accepted treatments of aneurysms include surgical clipping or endovascular embolization.</li><li>• Signed and dated informed written consent by the subject or his/her legally authorized representative.</li></ul> |
| <p><b><i>Exclusions</i></b></p> <ul style="list-style-type: none"><li>• Time of symptom onset cannot be reliably assessed.</li><li>• No demonstrable aneurysm by cerebral angiography.</li><li>• Evidence of traumatic, mycotic, or fusiform aneurysm by cerebral angiography.</li><li>• World Federation of Neurological Surgeons scale of IV and V</li><li>• Head computed tomography rating scale of 0 – 1</li><li>• History within the past 6 months, and/or physical findings on admission of decompensated heart failure (NYHA Class III and IV or heart failure requiring hospitalization). (162)</li><li>• Patient has received albumin prior to treatment assignment during the present admission.</li><li>• Hospitalization for or diagnosis of acute myocardial infarction within the preceding 3</li></ul>                                                                                                                                                                                                                                                                                              |

months.

- Symptoms or electrocardiographic signs indicative of acute MI on admission.
- Electrocardiographic evidence and/or physical findings compatible with second- or third-degree heart block, or of cardiac arrhythmia associated with hemodynamic instability.
- Echocardiogram performed before treatment revealing a left ventricular ejection fraction  $\leq 40\%$  (if available).
- Serum creatinine  $> 2.0$  mg/dl or creatinine clearance  $< 50$  ml/min.
- Pregnancy, lactation or parturition within previous 30 days.
- Known allergy to albumin.
- Severe prior physical disability (Rankin Scale  $> 2$ ) that precludes evaluation of clinical outcome measures.
- History of severe chronic obstructive lung disease ( $FEV_1 < 50\%$  predicted, increased shortness of breath, and repeated exacerbations which have an impact on patients' QOL
- History of confirmed or suspected liver failure (increased prothrombin time, elevated liver enzymes, hypoalbuminemia, and hyperbilirubinemia with or without peripheral edema and encephalopathy)
- Current participation in another drug treatment protocol.
- Severe terminal disease with life expectancy less than 6 months.

**Table S3.** Serum albumin concentration up to 15 days after ALB treatment initiation.

| SERUM ALBUMIN (G/DL) |         | DAY      |      |      |      |      |      |      |      |      |      |      |      |      |      |      |      |
|----------------------|---------|----------|------|------|------|------|------|------|------|------|------|------|------|------|------|------|------|
|                      |         | BASELINE | 1    | 2    | 3    | 4    | 5    | 6    | 7    | 8    | 9    | 10   | 11   | 12   | 13   | 14   | 15   |
| TIER 1               | TOTAL_N | 16       | 16   | 18   | 14   | 18   | 17   | 16   | 17   | 13   | 10   | 8    | 9    | 6    | 8    | 4    | 4    |
|                      | Mean    | 3.51     | 3.51 | 3.99 | 4.28 | 4.53 | 4.61 | 4.73 | 4.82 | 4.89 | 4.43 | 4.13 | 4.16 | 4.05 | 3.80 | 4.07 | 4.12 |
|                      | SD      | 0.43     | 0.35 | 0.36 | 0.43 | 0.58 | 0.54 | 0.64 | 0.60 | 0.55 | 0.48 | 0.47 | 0.67 | 0.32 | 0.42 | 0.63 | 0.75 |
|                      | Median  | 3        | 3    | 4    | 4    | 4    | 5    | 5    | 5    | 5    | 5    | 4    | 4    | 4    | 4    | 4    | 4    |
|                      | Min     | 3        | 3    | 3    | 4    | 4    | 4    | 3    | 4    | 4    | 3    | 3    | 3    | 4    | 3    | 3    | 3    |
|                      | Max     | 5        | 4    | 5    | 5    | 6    | 6    | 6    | 6    | 6    | 5    | 5    | 6    | 5    | 4    | 5    | 5    |
| TIER 2               | TOTAL_N | 15       | 14   | 17   | 19   | 19   | 19   | 15   | 16   | 15   | 13   | 10   | 7    | 8    | 6    | 6    | 5    |
|                      | Mean    | 3.67     | 3.91 | 4.56 | 4.65 | 4.90 | 4.92 | 4.89 | 5.19 | 5.51 | 4.98 | 4.60 | 4.31 | 4.27 | 4.12 | 4.20 | 4.06 |
|                      | SD      | 0.73     | 0.75 | 1.75 | 0.82 | 0.78 | 0.84 | 0.84 | 0.82 | 0.74 | 0.84 | 0.68 | 0.47 | 0.53 | 0.55 | 0.37 | 0.73 |
|                      | Median  | 4        | 4    | 4    | 5    | 5    | 5    | 5    | 5    | 6    | 5    | 5    | 4    | 4    | 4    | 4    | 4    |
|                      | Min     | 3        | 3    | 3    | 3    | 3    | 3    | 3    | 3    | 4    | 3    | 3    | 3    | 3    | 3    | 4    | 4    |
|                      | Max     | 5        | 5    | 11   | 6    | 7    | 6    | 6    | 6    | 7    | 6    | 6    | 5    | 5    | 5    | 5    | 5    |
| TIER 3               | TOTAL_N | 7        | 7    | 6    | 6    | 5    | 5    | 5    | 5    | 5    | 5    | 4    | 4    | 3    | 3    | 2    | 2    |
|                      | Mean    | 3.26     | 3.13 | 4.22 | 4.57 | 4.86 | 4.40 | 4.64 | 4.72 | 4.68 | 4.76 | 4.62 | 4.68 | 4.30 | 4.23 | 3.20 | 3.55 |
|                      | SD      | 0.44     | 0.35 | 0.25 | 0.54 | 0.83 | 1.19 | 1.29 | 1.57 | 1.54 | 1.68 | 1.68 | 1.75 | 2.07 | 1.91 | 1.56 | 2.19 |
|                      | Median  | 3        | 3    | 4    | 5    | 5    | 4    | 5    | 5    | 6    | 5    | 5    | 5    | 5    | 5    | 3    | 4    |
|                      | Min     | 3        | 3    | 4    | 4    | 4    | 3    | 3    | 3    | 3    | 2    | 2    | 2    | 2    | 2    | 2    | 2    |
|                      | Max     | 4        | 4    | 5    | 5    | 6    | 6    | 6    | 6    | 6    | 7    | 6    | 6    | 6    | 6    | 4    | 5    |

Definitions: ALB: 25% human albumin; Tier 1: 0.625 g/Kg/d x 7 days; Tier 2: 1.25 g/Kg/d x 7 days; Tier 3: 1.875 g/Kg/d x 7 days; SD: standard deviation; Min: minimum; Max: maximum.

**Table S4.** Maximum Mean Arterial Blood Pressure in mmHg up to 15 days after ALB treatment initiation.

| MAX MEAN ARTERIAL PRESSURE |         | DAY      |        |        |        |        |        |        |        |        |        |        |        |        |        |        |        |
|----------------------------|---------|----------|--------|--------|--------|--------|--------|--------|--------|--------|--------|--------|--------|--------|--------|--------|--------|
|                            |         | BASELINE | 1      | 2      | 3      | 4      | 5      | 6      | 7      | 8      | 9      | 10     | 11     | 12     | 13     | 14     | 15     |
| TIER 1                     | TOTAL_N | 20       | 20     | 20     | 20     | 20     | 20     | 20     | 19     | 18     | 16     | 15     | 13     | 11     | 9      | 7      | 4      |
|                            | Mean    | 106.75   | 109.80 | 108.90 | 117.65 | 118.80 | 119.40 | 119.10 | 115.32 | 114.61 | 118.63 | 114.47 | 115.85 | 123.55 | 117.44 | 113.29 | 119.75 |
|                            | SD      | 8.23     | 16.8   | 17.5   | 14.8   | 13.5   | 16.7   | 14.8   | 18.5   | 17.4   | 20.3   | 25.6   | 21.4   | 19.6   | 16.6   | 21.9   | 21.8   |
|                            | Median  | 108      | 108    | 115    | 118    | 121    | 116    | 119    | 115    | 114    | 118    | 109    | 118    | 119    | 115    | 111    | 116    |
|                            | Min     | 90       | 89     | 52     | 82     | 94     | 82     | 94     | 68     | 86     | 87     | 79     | 84     | 87     | 94     | 78     | 98     |
|                            | Max     | 126      | 167    | 126    | 140    | 141    | 160    | 143    | 154    | 162    | 165    | 182    | 165    | 157    | 152    | 151    | 149    |
| TIER 2                     | TOTAL_N | 19       | 19     | 20     | 20     | 20     | 20     | 19     | 19     | 18     | 17     | 15     | 14     | 11     | 11     | 11     | 9      |
|                            | Mean    | 117.58   | 115.26 | 120.00 | 118.95 | 122.70 | 125.20 | 122.58 | 118.79 | 125.22 | 118.41 | 117.27 | 113.57 | 118.91 | 123.91 | 116.91 | 111.44 |
|                            | SD      | 37.6     | 11.1   | 20.0   | 11.4   | 13.3   | 18.1   | 13.6   | 16.0   | 16.1   | 15.8   | 16.1   | 14.2   | 16.5   | 18.8   | 14.1   | 17.2   |
|                            | Median  | 112      | 118    | 120    | 122    | 122    | 126    | 126    | 120    | 124    | 124    | 118    | 111    | 123    | 121    | 117    | 114    |
|                            | Min     | 87       | 87     | 75     | 89     | 94     | 83     | 93     | 84     | 90     | 82     | 86     | 93     | 96     | 98     | 94     | 86     |
|                            | Max     | 261      | 133    | 170    | 135    | 145    | 151    | 142    | 148    | 159    | 146    | 143    | 136    | 146    | 160    | 138    | 142    |
| TIER 3                     | TOTAL_N | 7        | 7      | 7      | 7      | 7      | 7      | 7      | 6      | 6      | 6      | 5      | 5      | 4      | 4      | 3      | 3      |
|                            | Mean    | 106.43   | 108.71 | 115.00 | 114.57 | 112.43 | 112.43 | 116.86 | 112.67 | 117.50 | 111.33 | 116.80 | 109.40 | 113.00 | 109.75 | 105.67 | 113.33 |
|                            | SD      | 9.66     | 13.2   | 11.1   | 15.6   | 14.0   | 10.8   | 12.9   | 11.7   | 13.6   | 13.4   | 11.5   | 7.64   | 8.76   | 8.66   | 7.37   | 24.0   |
|                            | Median  | 105      | 107    | 115    | 115    | 115    | 113    | 116    | 118    | 122    | 116    | 118    | 110    | 110    | 109    | 103    | 100    |
|                            | Min     | 95       | 95     | 98     | 95     | 98     | 94     | 96     | 96     | 94     | 86     | 101    | 99     | 107    | 100    | 100    | 99     |
|                            | Max     | 124      | 135    | 135    | 142    | 136    | 125    | 135    | 124    | 131    | 122    | 128    | 118    | 126    | 121    | 114    | 141    |

Definitions: ALB: 25% human albumin; Tier 1: 0.625 g/Kg/d x 7 days; Tier 2: 1.25 g/Kg/d x 7 days; Tier 3: 1.875 g/Kg/d x 7days; SD: standard deviation; Min: minimum; Max: maximum.



**Table S5.** Serum Osmolality (mOsm/L) up to 15 days after ALB treatment initiation.

| PLASMA OSMOLALITY<br>(MOSM/L) |                | DAY      |        |        |        |        |        |        |        |        |        |        |        |        |        |        |        |
|-------------------------------|----------------|----------|--------|--------|--------|--------|--------|--------|--------|--------|--------|--------|--------|--------|--------|--------|--------|
|                               |                | BASELINE | 1      | 2      | 3      | 4      | 5      | 6      | 7      | 8      | 9      | 10     | 11     | 12     | 13     | 14     | 15     |
| <b>TIER 1</b>                 | <b>TOTAL_N</b> | 6        | 10     | 13     | 14     | 14     | 13     | 12     | 9      | 7      | 7      | 4      | 4      | 2      | 3      | 2      | 0      |
|                               | <b>Mean</b>    | 291.17   | 293.20 | 294.38 | 293.00 | 293.57 | 291.00 | 290.25 | 291.56 | 290.86 | 285.29 | 280.00 | 279.50 | 283.50 | 278.33 | 286.00 |        |
|                               | <b>SD</b>      | 9.83     | 8.07   | 6.37   | 8.53   | 10.4   | 6.93   | 10.2   | 12.4   | 9.41   | 13.6   | 6.38   | 11.8   | 4.95   | 8.62   | 19.8   |        |
|                               | <b>Median</b>  | 288      | 290    | 297    | 293    | 295    | 290    | 291    | 291    | 291    | 283    | 282    | 276    | 284    | 280    | 286    |        |
|                               | <b>Min</b>     | 283      | 285    | 284    | 278    | 273    | 280    | 273    | 276    | 276    | 271    | 271    | 270    | 280    | 269    | 272    |        |
|                               | <b>Max</b>     | 310      | 310    | 301    | 308    | 309    | 307    | 309    | 313    | 305    | 309    | 285    | 296    | 287    | 286    | 300    |        |
| <b>TIER 2</b>                 | <b>TOTAL_N</b> | 11       | 14     | 15     | 14     | 14     | 14     | 17     | 13     | 11     | 11     | 8      | 6      | 6      | 4      | 3      | 3      |
|                               | <b>Mean</b>    | 289.82   | 286.79 | 287.80 | 291.36 | 290.50 | 288.93 | 291.41 | 302.23 | 298.45 | 290.64 | 289.50 | 294.67 | 289.83 | 288.50 | 288.00 | 287.33 |
|                               | <b>SD</b>      | 7.33     | 8.29   | 8.12   | 9.20   | 10.5   | 10.2   | 11.9   | 29.8   | 21.7   | 22.9   | 10.1   | 9.89   | 9.81   | 7.14   | 9.17   | 2.31   |
|                               | <b>Median</b>  | 290      | 287    | 285    | 288    | 290    | 287    | 288    | 293    | 293    | 288    | 288    | 298    | 288    | 286    | 286    | 286    |
|                               | <b>Min</b>     | 276      | 268    | 275    | 275    | 276    | 278    | 279    | 275    | 274    | 254    | 278    | 280    | 280    | 283    | 280    | 286    |
|                               | <b>Max</b>     | 300      | 300    | 306    | 314    | 316    | 317    | 328    | 385    | 358    | 347    | 307    | 304    | 306    | 299    | 298    | 290    |
| <b>TIER 3</b>                 | <b>TOTAL_N</b> | 5        | 6      | 6      | 6      | 6      | 6      | 5      | 6      | 5      | 5      | 4      | 3      | 3      | 2      | 1      | 1      |
|                               | <b>Mean</b>    | 287.80   | 283.33 | 290.17 | 303.00 | 289.83 | 289.50 | 295.00 | 294.17 | 287.00 | 286.00 | 290.75 | 282.33 | 298.67 | 282.50 | 283.00 | 277.00 |
|                               | <b>SD</b>      | 6.30     | 5.99   | 11.5   | 36.1   | 10.1   | 17.1   | 18.7   | 17.2   | 15.9   | 8.97   | 22.0   | 2.52   | 26.3   | 0.71   | .      | .      |
|                               | <b>Median</b>  | 288      | 283    | 287    | 285    | 285    | 285    | 287    | 287    | 283    | 285    | 283    | 282    | 284    | 283    | 283    | 277    |
|                               | <b>Min</b>     | 278      | 278    | 280    | 277    | 281    | 270    | 276    | 277    | 270    | 275    | 274    | 280    | 283    | 282    | 283    | 277    |
|                               | <b>Max</b>     | 295      | 291    | 309    | 370    | 307    | 320    | 317    | 320    | 313    | 300    | 323    | 285    | 329    | 283    | 283    | 277    |

Definitions: ALB: 25% human albumin; Tier 1: 0.625 g/Kg/d x 7 days; Tier 2: 1.25 g/Kg/d x 7 days; Tier 3: 1.875 g/Kg/d x 7days; SD: standard deviation; Min: minimum; Max: maximum.

**Table S6.** Serum creatinine up to 15 days after ALB treatment initiation.

| SERUM CREATININE<br>(MG/DL) |         | DAY      |      |      |      |      |      |      |      |      |      |      |      |      |      |      |      |
|-----------------------------|---------|----------|------|------|------|------|------|------|------|------|------|------|------|------|------|------|------|
|                             |         | BASELINE | 1    | 2    | 3    | 4    | 5    | 6    | 7    | 8    | 9    | 10   | 11   | 12   | 13   | 14   | 15   |
| TIER 1                      | TOTAL_N | 20       | 20   | 19   | 19   | 20   | 20   | 20   | 18   | 18   | 13   | 13   | 13   | 11   | 9    | 7    | 5    |
|                             | Mean    | 0.69     | 0.70 | 0.67 | 0.68 | 0.65 | 0.65 | 0.69 | 0.67 | 0.68 | 0.66 | 0.69 | 0.68 | 0.69 | 0.65 | 0.65 | 0.62 |
|                             | SD      | 0.11     | 0.10 | 0.13 | 0.13 | 0.12 | 0.14 | 0.14 | 0.13 | 0.13 | 0.09 | 0.16 | 0.18 | 0.22 | 0.18 | 0.17 | 0.13 |
|                             | Median  | 1        | 1    | 1    | 1    | 1    | 1    | 1    | 1    | 1    | 1    | 1    | 1    | 1    | 1    | 1    | 1    |
|                             | Min     | 1        | 1    | 1    | 0    | 0    | 0    | 0    | 0    | 0    | 1    | 1    | 0    | 0    | 1    | 0    | 1    |
|                             | Max     | 1        | 1    | 1    | 1    | 1    | 1    | 1    | 1    | 1    | 1    | 1    | 1    | 1    | 1    | 1    | 1    |
| TIER 2                      | TOTAL_N | 20       | 19   | 20   | 20   | 20   | 20   | 19   | 19   | 18   | 16   | 14   | 13   | 10   | 8    | 10   | 8    |
|                             | Mean    | 0.68     | 0.67 | 0.64 | 0.65 | 0.66 | 0.65 | 0.63 | 0.63 | 0.65 | 0.64 | 0.61 | 0.63 | 0.55 | 0.61 | 0.63 | 0.57 |
|                             | SD      | 0.13     | 0.16 | 0.18 | 0.16 | 0.18 | 0.15 | 0.17 | 0.16 | 0.16 | 0.14 | 0.16 | 0.17 | 0.14 | 0.18 | 0.15 | 0.12 |
|                             | Median  | 1        | 1    | 1    | 1    | 1    | 1    | 1    | 1    | 1    | 1    | 1    | 1    | 1    | 1    | 1    | 1    |
|                             | Min     | 0        | 0    | 0    | 0    | 0    | 0    | 0    | 0    | 0    | 0    | 0    | 0    | 0    | 0    | 0    | 0    |
|                             | Max     | 1        | 1    | 1    | 1    | 1    | 1    | 1    | 1    | 1    | 1    | 1    | 1    | 1    | 1    | 1    | 1    |
| TIER 3                      | TOTAL_N | 6        | 6    | 7    | 7    | 7    | 6    | 7    | 6    | 5    | 6    | 5    | 5    | 4    | 4    | 3    | 3    |
|                             | Mean    | 0.55     | 0.52 | 0.56 | 0.58 | 0.65 | 0.69 | 0.72 | 0.69 | 0.71 | 0.70 | 0.76 | 0.77 | 0.79 | 0.72 | 0.73 | 0.72 |
|                             | SD      | 0.17     | 0.11 | 0.11 | 0.12 | 0.27 | 0.28 | 0.31 | 0.30 | 0.29 | 0.26 | 0.39 | 0.31 | 0.28 | 0.23 | 0.23 | 0.24 |
|                             | Median  | 1        | 0    | 1    | 1    | 1    | 1    | 1    | 1    | 1    | 1    | 1    | 1    | 1    | 1    | 1    | 1    |
|                             | Min     | 0        | 0    | 0    | 0    | 0    | 0    | 0    | 0    | 0    | 0    | 0    | 1    | 1    | 1    | 1    | 1    |
|                             | Max     | 1        | 1    | 1    | 1    | 1    | 1    | 1    | 1    | 1    | 1    | 1    | 1    | 1    | 1    | 1    | 1    |

Definitions: ALB: 25% human albumin; Tier 1: 0.625 g/Kg/d x 7 days; Tier 2: 1.25 g/Kg/d x 7 days; Tier 3: 1.875 g/Kg/d x 7days; SD: standard deviation; Min: minimum; Max: maximum.

**Table S7.** Daily fluid balance up to 15 days after ALB treatment initiation.

| FLUID BALANCE |         | DAY      |        |        |        |        |        |        |        |        |        |        |        |        |        |        |        |
|---------------|---------|----------|--------|--------|--------|--------|--------|--------|--------|--------|--------|--------|--------|--------|--------|--------|--------|
|               |         | BASELINE | 1      | 2      | 3      | 4      | 5      | 6      | 7      | 8      | 9      | 10     | 11     | 12     | 13     | 14     | 15     |
| TIER 1        | TOTAL_N | 20       | 20     | 20     | 19     | 20     | 20     | 20     | 16     | 17     | 13     | 12     | 11     | 9      | 9      | 6      | 4      |
|               | Mean    | -378.9   | -414.1 | -630.3 | -524.8 | -130.8 | -27.05 | 93.20  | 394.06 | 134.29 | 334.23 | -235.4 | 139.09 | 168.56 | 311.44 | 1360.8 | 903.50 |
|               | SD      | 1198     | 1143   | 1247   | 1278   | 1428   | 967    | 1004   | 784    | 785    | 1595   | 833    | 1201   | 809    | 1127   | 649    | 1195   |
|               | Median  | -273     | -273   | -303   | -338   | -177   | -25    | 73     | 468    | 133    | -132   | -262   | -364   | 175    | 212    | 1514   | 528    |
|               | Min     | -2498    | -2498  | -4036  | -3155  | -3011  | -1307  | -2332  | -1224  | -1730  | -2559  | -1369  | -1380  | -1340  | -1510  | 142    | 0      |
|               | Max     | 1878     | 1378   | 1280   | 1298   | 2493   | 2042   | 1619   | 1658   | 1270   | 3150   | 1648   | 3011   | 1356   | 2120   | 2041   | 2558   |
| TIER 2        | TOTAL_N | 19       | 18     | 20     | 20     | 20     | 19     | 18     | 18     | 18     | 12     | 12     | 12     | 9      | 8      | 8      | 8      |
|               | Mean    | 516.11   | 478.33 | -145.3 | 72.10  | -81.05 | 586.84 | -42.43 | 28.28  | -281.5 | 207.67 | 385.50 | 165.50 | 73.89  | -513.8 | 170.88 | 209.88 |
|               | SD      | 1505     | 1326   | 1385   | 1298   | 1412   | 1716   | 1510   | 1279   | 1216   | 1147   | 1085   | 1096   | 861    | 1227   | 1185   | 1071   |
|               | Median  | 858      | 461    | -138   | 150    | -210   | 165    | -23    | -258   | -96    | 193    | 301    | 73     | 172    | -553   | 318    | 55     |
|               | Min     | -4100    | -1501  | -3960  | -2325  | -2333  | -1447  | -4377  | -1889  | -3062  | -1000  | -1889  | -2000  | -1440  | -1870  | -2304  | -1513  |
|               | Max     | 2045     | 3500   | 2164   | 2217   | 3932   | 5111   | 2411   | 2730   | 1700   | 3050   | 2600   | 2372   | 1200   | 1350   | 1770   | 2220   |
| TIER 3        | TOTAL_N | 7        | 7      | 7      | 7      | 7      | 7      | 6      | 5      | 4      | 4      | 4      | 4      | 3      | 3      | 3      | 3      |
|               | Mean    | 360.86   | -623.1 | -1291  | -134.6 | 166.43 | 120.57 | 532.50 | 1321.8 | 1136.8 | 329.00 | -539.8 | 149.50 | -383.3 | -200.3 | 258.67 | -76.67 |
|               | SD      | 1212     | 1788   | 1341   | 1470   | 1334   | 987    | 817    | 534    | 818    | 867    | 1161   | 1538   | 953    | 1321   | 1498   | 1091   |
|               | Median  | 181      | -185   | -1755  | 385    | -334   | -300   | 410    | 1565   | 1125   | 553    | -752   | -571   | -65    | 40     | 1066   | -635   |
|               | Min     | -1320    | -3978  | -3201  | -2220  | -1375  | -1015  | -515   | 725    | 197    | -864   | -1705  | -710   | -1455  | -1625  | -1470  | -775   |
|               | Max     | 2119     | 1495   | 705    | 1215   | 2119   | 1869   | 1764   | 1933   | 2100   | 1075   | 1050   | 2450   | 370    | 984    | 1180   | 1180   |

**Table S8.** Daily weights up to 15 days after ALB treatment initiation.

| WEIGHT |         | DAY      |       |       |       |       |       |       |       |       |       |       |       |       |       |       |       |
|--------|---------|----------|-------|-------|-------|-------|-------|-------|-------|-------|-------|-------|-------|-------|-------|-------|-------|
|        |         | BASELINE | 1     | 2     | 3     | 4     | 5     | 6     | 7     | 8     | 9     | 10    | 11    | 12    | 13    | 14    | 15    |
| TIER 1 | TOTAL_N | 18       | 20    | 20    | 19    | 20    | 20    | 20    | 19    | 9     | 7     | 11    | 8     | 4     | 6     | 4     | 3     |
|        | Mean    | 73.17    | 73.45 | 73.45 | 72.31 | 73.06 | 73.11 | 73.06 | 72.69 | 67.33 | 64.13 | 71.75 | 73.85 | 68.82 | 62.52 | 64.40 | 71.37 |
|        | SD      | 13.6     | 14.0  | 14.0  | 13.6  | 13.7  | 13.7  | 13.7  | 14.0  | 11.6  | 18.3  | 15.5  | 14.7  | 16.4  | 13.0  | 15.6  | 15.9  |
|        | Median  | 74       | 74    | 74    | 72    | 74    | 74    | 74    | 72    | 67    | 67    | 67    | 72    | 66    | 59    | 63    | 81    |
|        | Min     | 53       | 53    | 53    | 53    | 53    | 53    | 53    | 53    | 53    | 36    | 53    | 53    | 53    | 49    | 50    | 53    |
|        | Max     | 92       | 98    | 98    | 98    | 98    | 98    | 98    | 98    | 98    | 90    | 90    | 101   | 96    | 90    | 83    | 82    |
| TIER 2 | TOTAL_N | 17       | 20    | 20    | 20    | 20    | 20    | 19    | 19    | 16    | 12    | 11    | 10    | 7     | 5     | 5     | 4     |
|        | Mean    | 72.31    | 72.65 | 72.59 | 72.74 | 72.64 | 72.67 | 72.71 | 72.65 | 73.72 | 74.14 | 73.48 | 73.53 | 73.39 | 66.82 | 66.90 | 69.30 |
|        | SD      | 10.0     | 9.87  | 10.4  | 9.98  | 9.98  | 9.96  | 10.3  | 10.3  | 12.0  | 11.6  | 11.2  | 11.5  | 12.1  | 8.66  | 8.63  | 8.32  |
|        | Median  | 70       | 70    | 69    | 73    | 72    | 72    | 70    | 70    | 72    | 75    | 75    | 74    | 75    | 64    | 65    | 71    |
|        | Min     | 59       | 59    | 59    | 59    | 59    | 59    | 59    | 59    | 59    | 59    | 59    | 59    | 59    | 59    | 59    | 59    |
|        | Max     | 90       | 90    | 94    | 90    | 90    | 90    | 90    | 90    | 95    | 95    | 90    | 89    | 90    | 77    | 77    | 77    |
| TIER 3 | TOTAL_N | 7        | 7     | 7     | 7     | 5     | 5     | 3     | 3     | 2     | 2     | 2     | 2     | 2     | 1     | 0     | 1     |
|        | Mean    | 67.61    | 67.63 | 68.30 | 68.19 | 70.40 | 71.28 | 66.67 | 66.67 | 69.95 | 71.50 | 69.95 | 69.30 | 69.95 | 87.80 | .     | 87.00 |
|        | SD      | 15.0     | 15.0  | 15.5  | 15.3  | 13.9  | 14.3  | 18.2  | 18.2  | 25.4  | 27.6  | 25.4  | 24.5  | 25.4  | .     | .     | .     |
|        | Median  | 74       | 74    | 74    | 74    | 74    | 78    | 61    | 61    | 70    | 72    | 70    | 69    | 70    | 88    | .     | 87    |
|        | Min     | 46       | 46    | 46    | 46    | 52    | 52    | 52    | 52    | 52    | 52    | 52    | 52    | 52    | 88    | .     | 87    |
|        | Max     | 87       | 87    | 87    | 87    | 87    | 87    | 87    | 87    | 87    | 88    | 91    | 88    | 87    | 88    | 88    | .     |

Definitions: ALB: 25% human albumin; Tier 1: 0.625 g/Kg/d x 7 days; Tier 2: 1.25 g/Kg/d x 7 days; Tier 3: 1.875 g/Kg/d x 7days; SD: standard deviation; Min: minimum; Max: maximum.
